# Supplementary material
Source: PubMed Central journal article supplement (PMC3523346)
Supplement: NIHMS415524-supplement-Supporting_Information.pdf [file NIHMS415524-supplement-Supporting_Information.pdf]

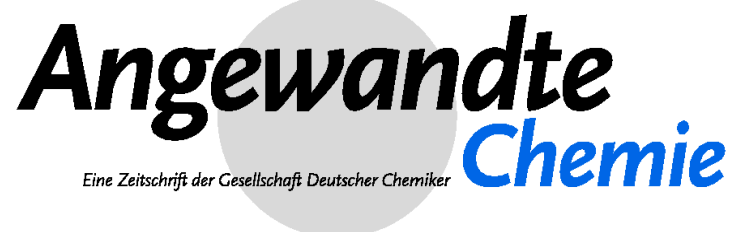

Supporting Information

© Wiley-VCH 2009

69451 Weinheim, Germany

# Multiplexed Protein Arrays Enabled by Polymer Pen Lithography: Addressing the Inking Challenge

Zijian Zheng, Weston L. Daniel, Louise R. Giam, Fengwei Huo, Andrew J. Senesi, Gengfeng Zheng, and Chad A. Mirkin

## Supporting Information

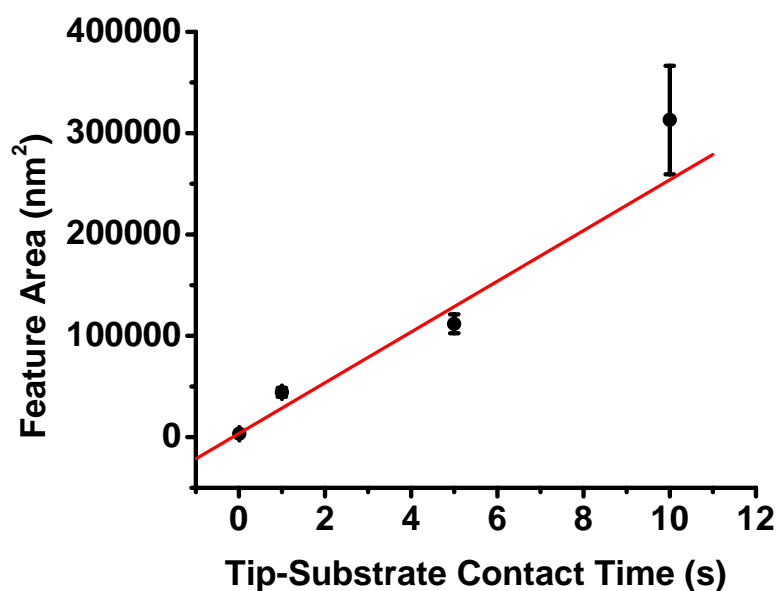

**Figure S1.** Feature areas of patterned proteins as a function of tip-substrate contact time when the tip is just in contact with the substrate. The red solid line is a linear fit of the data.

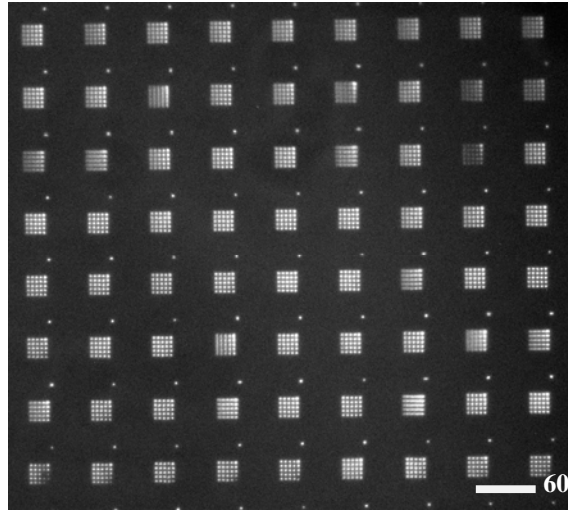

**Figure S2.** Fluorescence microscopy image of Alexa Fluor 488 conjugated PSA selectively bound to anti-PSA arrays. The anti-PSA arrays were patterned on a Codelink slide by PPL and immersed in a solution containing two proteins: Alexa Fluor 488 conjugated PSA and Alexa Fluor 647 conjugated cholera toxin beta.

**Movie 1.** The movie shows the optical view from the glass side of a PPL array when it is dipped into, and then withdrawn from, a Si mould filled with protein inks.
